# Supplementary material
Source: publisher figshare collection journal article supplement (https://gsapubs.figshare.com/ndownloader/files/22757894)
Supplement: Supplementary file 1 [file 22757894]

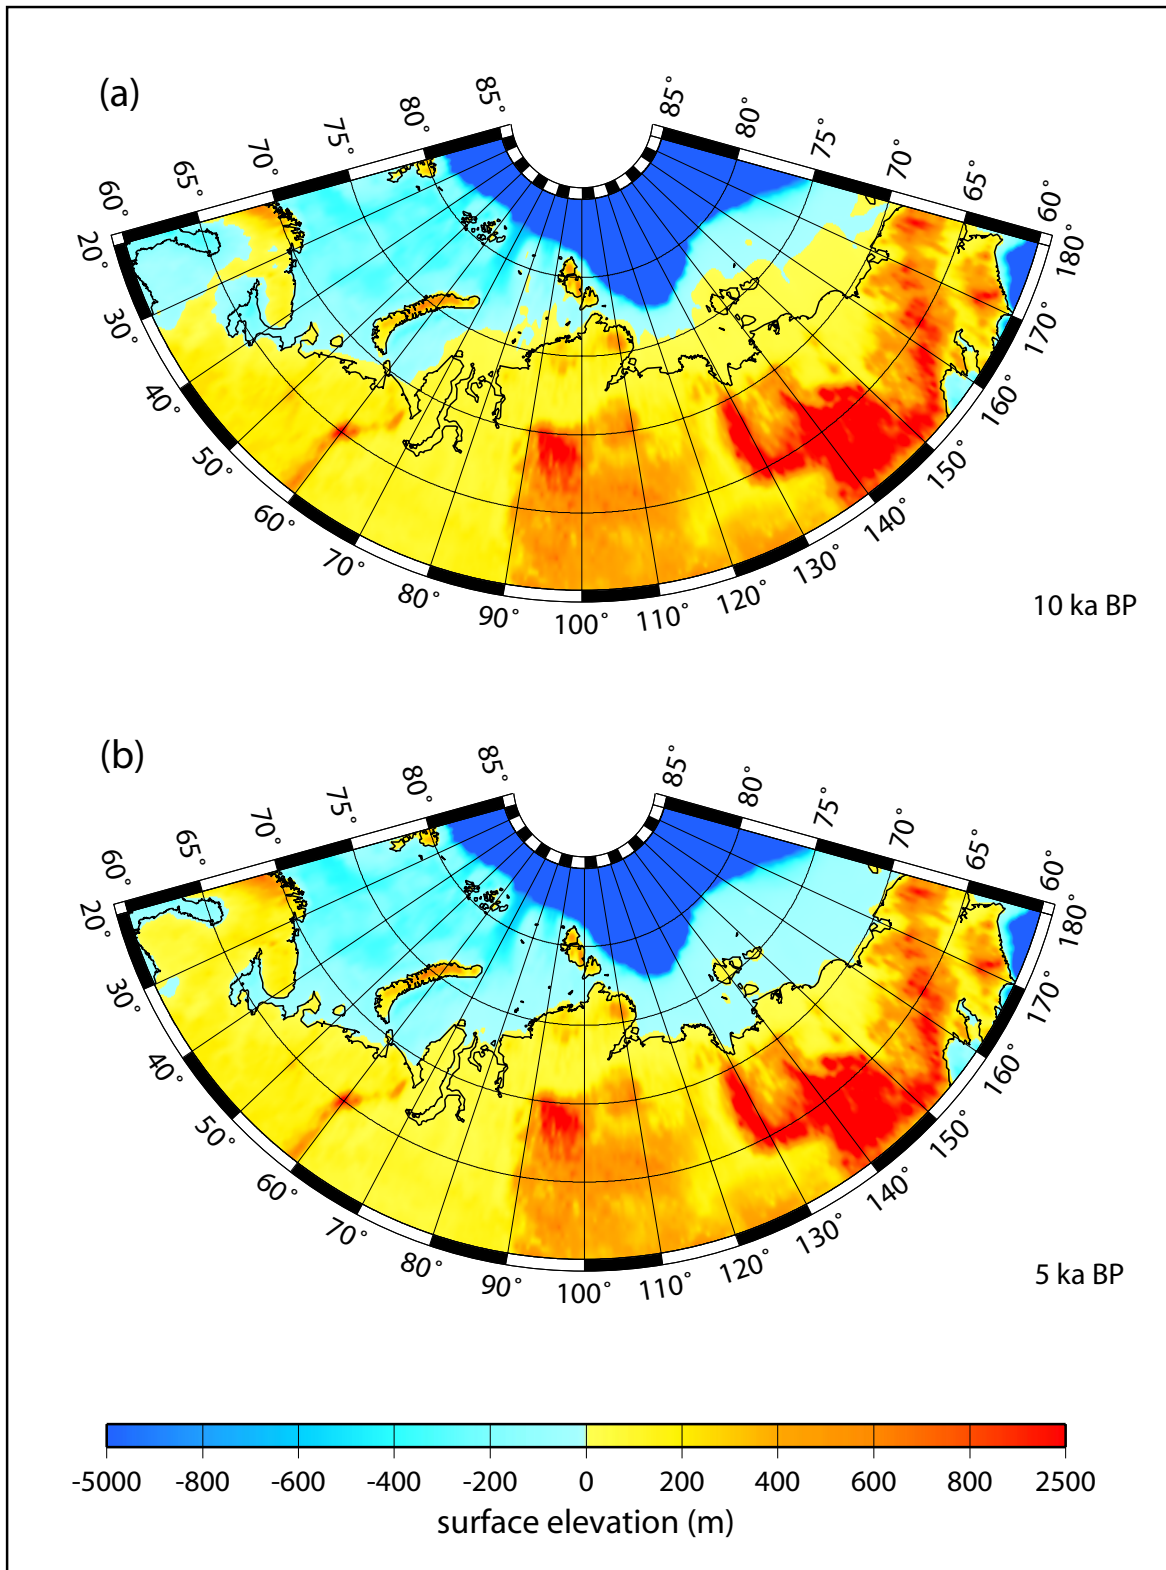

Figure DR1: Paleotopography of the Eurasian margin at (a) 10 ka BP and (b) 5 ka BP. The present day coastline is shown in black in both figures.
